# Supplementary material for: Challenges for the Self-Assembly of Poly(Ethylene Glycol)–Poly(Lactic Acid) (PEG-PLA) into Polymersomes: Beyond the Theoretical Paradigms
Source: MDPI journal article supplement (doi:10.3390/nano8060373), 2018-05-26
Supplement: s1 [file s1]

Supporting Information

# Challenges for the self-assembly of poly (ethylene glycol)–poly (lactic acid) (PEG-PLA) into polymersomes: beyond the hydrophilic volume fraction (*f*)

Alexsandra Conceição Apolinário<sup>1</sup>, Monika S Magoń<sup>2,3</sup>, Adalberto Pessoa Jr.<sup>1</sup> and Carlota de Oliveira Rangel-Yagui<sup>1,\*</sup>

<sup>1</sup> Department of Biochemical and Pharmaceutical Technology, School of Pharmaceutical Sciences, University of São Paulo, Av. Prof. Lineu Prestes, 580 - Bl.16, CEP: 05508-000, Brazil; acapolinario@gmail.com

<sup>2</sup> Department of Chemistry, University College London, Christopher Ingold Building, 20 Gordon Street WC1H 0AJ, London, United Kingdom; [m.magon.12@ucl.ac.uk](mailto:m.magon.12@ucl.ac.uk)

<sup>3</sup> Current address: BSRC Complex, School of Biology, University of St Andrews, St Andrews KY16 9ST, United Kingdom

\* Correspondence: [corangel@usp.br](mailto:corangel@usp.br); Tel.: + 55 11 30912381

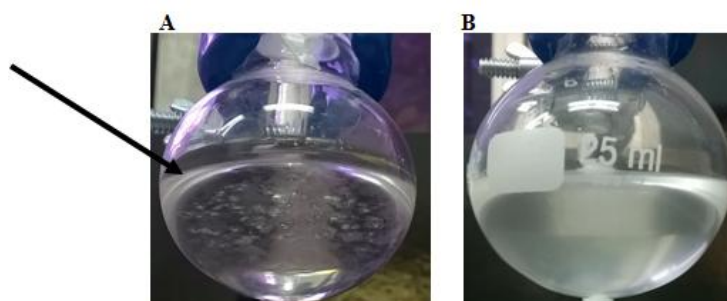

Figure S1. Aspects of poly(ethylene glycol)–poly(lactic acid) (PEG-PLA) system formed by film hydration by A) orbital stirring at 150 RPM and B) magnetic stirring at 400 RMP.

**Table S1.** Dynamic Light Scattering profile and respective polydispersity index (PDI) of nanostructures formed by poly(ethylene glycol)–poly(lactic acid) (PEG-PLA) by film hydration under magnetic stirring at 400 RPM after overnight.

| Copolymer                             | Scattering Intensity (nm)        | Scattering by Number (nm) | PDI   |
|---------------------------------------|----------------------------------|---------------------------|-------|
| PEG <sub>45</sub> PLA <sub>69</sub>   | 466 (100%)                       | 416.1 (100%)              | 1     |
| PEG <sub>114</sub> PLA <sub>153</sub> | 558.4 (85.1 %) and 155.4 (14.9%) | 200.9 (100 %)             | 0.771 |
| PEG <sub>114</sub> PLA <sub>180</sub> | 439.9 (96.9%) and 5331 (3.1%)    | 185.7 (100%)              | 0.609 |

**Table S2.** Dynamic Light Scattering profile and respective polydispersity index (PDI) of nanostructures formed by poly(ethylene glycol)-poly(lactic acid) (PEG-PLA) by film hydration under magnetic stirring at 400 RPM and different times of sonication.

| Copolymer                                                | Sonication by 20 min                                |                                                   | Sonication by 50 min                             |                              |
|----------------------------------------------------------|-----------------------------------------------------|---------------------------------------------------|--------------------------------------------------|------------------------------|
|                                                          | Scattering Intensity (nm)                           | Scattering by Number (nm)                         | Scattering Intensity (nm)                        | Scattering by Number (nm)    |
| PEG <sub>45</sub> -PLA <sub>69</sub><br>(2000:5000 MW)   | 600.6 (46 %)<br>380(45.2%) and<br>186 (8.8%)        | 165(50.6%) and<br>400 (49.4%)                     | 376 (58 %), 1050<br>(30%) and 4379<br>(12%)      | 341 (94 %) and<br>1024 (6%)  |
| PEG <sub>114</sub> PLA <sub>153</sub><br>(5000:11000 MW) | 1081 (62.8%),<br>276.5 (28.7 %) and 4788<br>(8,5 %) | 952.1 (7.8%), 226.5<br>(92.1%) and 4601<br>(0.1%) | 659.4 (57%), 245.4<br>(35.3%) and 5059<br>(7.8%) | 232 (99%) and<br>5005 (0.1%) |
| PEG <sub>114</sub> PLA <sub>180</sub><br>(5000:13000 MW) | 446(99 %) and<br>5560 (1%)                          | 218 (100%)                                        | 454 (95.4%), 5298<br>(2.6%) and 86<br>(2%)       | 204 (70%) and<br>75 (30%)    |

**Table S3.** Dynamic Light Scattering profile and respective polydispersity index (PDI) of nanostructures formed by PEG<sub>45</sub>-PLA<sub>69</sub> (2000:5000 MW) by film hydration under magnetic stirring at 400 RPM at different times and temperatures.

| PEG <sub>45</sub> -PLA <sub>69</sub> (2000:5000 MW) | Scattering Intensity                     | Scattering by Number         |
|-----------------------------------------------------|------------------------------------------|------------------------------|
| Agitation for 24 hours at room temperature          | 572 (100%)                               | 491.6 (100%)                 |
| Agitation for 24 hours at 40°C                      | 390.2 (96%), 122.6 (3%) and<br>5560 (1%) | 106.6 (31%) and 326<br>(69%) |
| Agitation for 48 hours at room temperature          | 467 (97%) and 155 (3%)                   | 415 (64%) and 164<br>(36%)   |
| Agitation for 48 hours at 40°C                      | 460 (95%), 4919(4%) and 108<br>(1%)      | 392 (70%) and 90<br>(30%)    |
| Agitation for 72 hours at room temperature          | 752 (56%) and 335 (44%)                  | 324 (100%)                   |
| Agitation for 72 hours at 40°C                      | 758 (62%), 270 (37%) and 5296<br>(1%)    | 286 (100%)                   |

**Table S4.** Dynamic Light Scattering profile and respective polydispersity index (PDI) of nanostructures formed by PEG<sub>114</sub>PLA<sub>153</sub> (5000:11000 MW) by film hydration under magnetic stirring at 400 RPM at different times and temperatures.

| PEG <sub>114</sub> PLA <sub>153</sub> (5000:11000 MW)    | Intensity                         | Number                    |
|----------------------------------------------------------|-----------------------------------|---------------------------|
| Agitation for 24 hours at room temperature               | 362 (100%)                        | 110 (51%) and 283 (49%)   |
| Agitation for 24 hours at 40°C                           | 349 (93%) and 109 (7%)            | 280 (37%) and 93 (63%)    |
| Agitation for 48 hours at room temperature               | 357.5 (100 %)                     | 140 (19%) and 294 (81%)   |
| Agitation for 48 hours at 40°C                           | 567 (73%) and 176 (27%)           | 520 (6%) and 138 (94%)    |
| Agitation for 48 hours and sonication for 50 min at 40°C | 309 (92%) and 4224 (8%)           | 66.44 (30%) and 142 (70%) |
| Agitation for 72 hours at room temperature               | 401 (94%) and 5321 (6%)           | 136 (100%)                |
| Agitation for 72 hours at 40°C                           | 574 (52%), 234 (47%) and 5560(1%) | 192 (100%)                |

**Table S5.** Dynamic Light Scattering profile and respective polydispersity index (PDI) of nanostructures formed by PEG<sub>114</sub>PLA<sub>180</sub> (5000:13000 MW) by film hydration under magnetic stirring at 400 RPM at different times and temperatures.

| PEG <sub>114</sub> PLA <sub>180</sub> (5000:13000 MW) | Intensity                          | Number                   |
|-------------------------------------------------------|------------------------------------|--------------------------|
| Agitation for 24 hours at room temperature            | 745 (59%), 276 (40%) and 5526 (1%) | 246 (86%) and 670 (14%)  |
| Agitation for 24 hours at 40°C                        | 200.6 (100 %) and 5448 (1%)        | 128 (80%) and 53 (20%)   |
| Agitation for 48 hours at room temperature            | 596 (98) and 167(2%)               | 376(84 %) and 160 (16%)  |
| Agitation for 48 hours at 40°C                        | 229 (83%) and 623.4 (17%)          | 115 (25%) and 218 (75 %) |
| Agitation for 72 hours at room temperature            | 450 (60%), 216 (36%) and 5156 (4%) | 177 (100%)               |
| Agitation for 72 hours at 40°C                        | 325 (78.5%) and 129.5 (21%)        | 119 (100%)               |

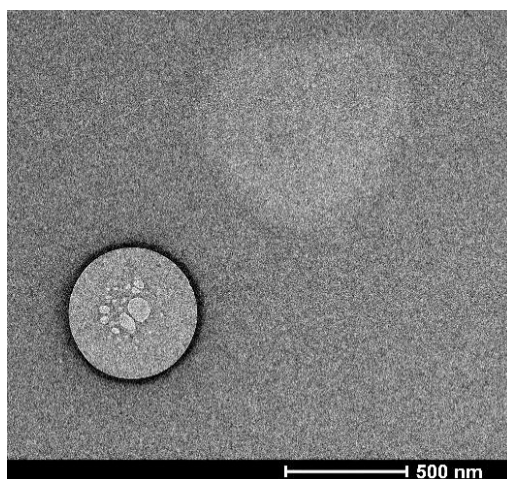

**Figure S2.** Polymersomes from poly(ethylene glycol)-poly(lactic acid) PEG<sub>114</sub>PLA<sub>153</sub> after extrusion through 0.4  $\mu\text{m}$  pores.

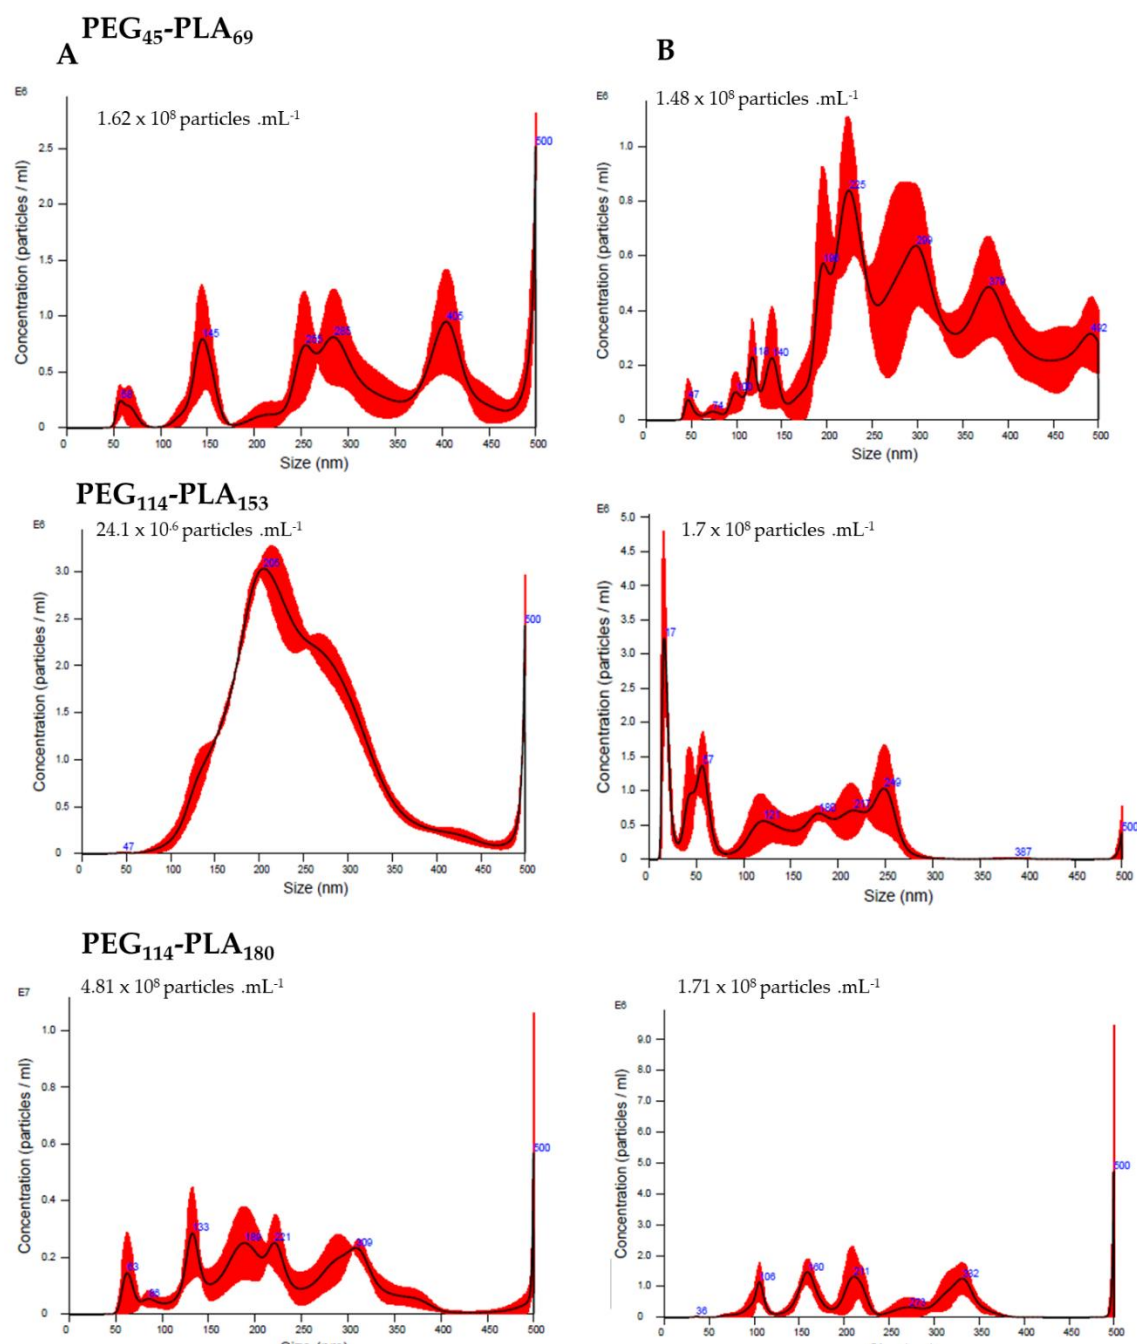

**Figure S3.** Nanoparticle Tracking Analysis of poly(ethylene glycol)-poly(lactic acid) (PEG-PLA) nanostructures after centrifugation: A) 0.1 % (m/v) B) At 0.03 % (m/v).

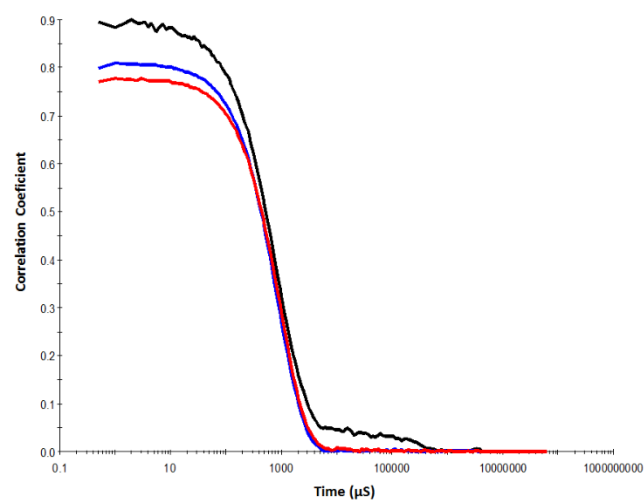

**Figure S4.** Correlation coefficients: Decaying time for nanostructures formed from PEG<sub>45</sub>-PLA<sub>69</sub> (black), PEG<sub>114</sub>PLA<sub>153</sub> (red) and PEG<sub>114</sub>PLA<sub>153</sub> (blue).
